# Supplementary material for: Precursors for Nonlymphoid-Tissue Treg Cells Reside in Secondary Lymphoid Organs and Are Programmed by the Transcription Factor BATF
Source: PubMed Central journal article supplement — Immunity. 2020 Feb 18;52(2):295–312.e11. doi: 10.1016/j.immuni.2019.12.002 (PMC7026712; doi:10.1016/j.immuni.2019.12.002), 2020-02-18
Supplement: mmc1.pdf [file mmc1.pdf]

**Supplemental Information**

**Precursors for Nonlymphoid-Tissue Treg Cells  
Reside in Secondary Lymphoid Organs and Are  
Programmed by the Transcription Factor BATF**

**Michael Delacher, Charles D. Imbusch, Agnes Hotz-Wagenblatt, Jan-Philipp Mallm, Katharina Bauer, Malte Simon, Dania Riegel, André F. Rendeiro, Sebastian Bittner, Lieke Sanderink, Asmita Pant, Lisa Schmidleithner, Kathrin L. Braband, Bernd Echtenachter, Alexander Fischer, Valentina Giunchiglia, Petra Hoffmann, Matthias Edinger, Christoph Bock, Michael Rehli, Benedikt Brors, Christian Schmidl, and Markus Feuerer**

# Figure S1

## A

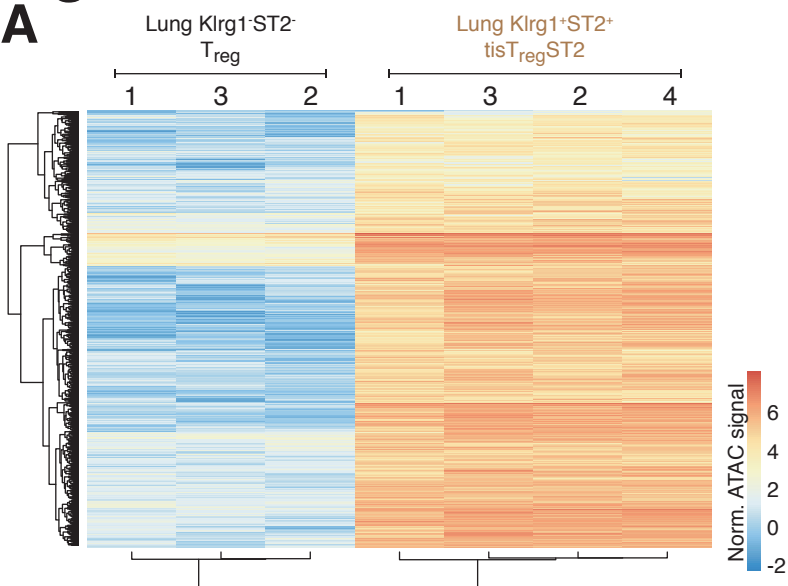

## B

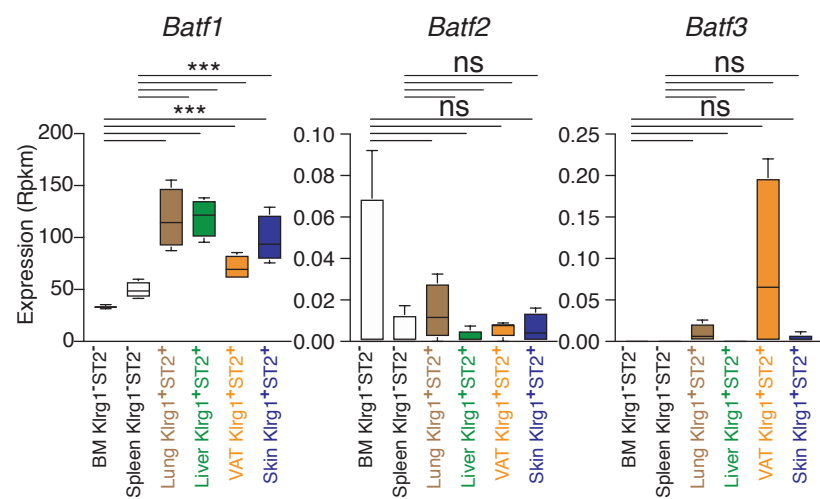

## C

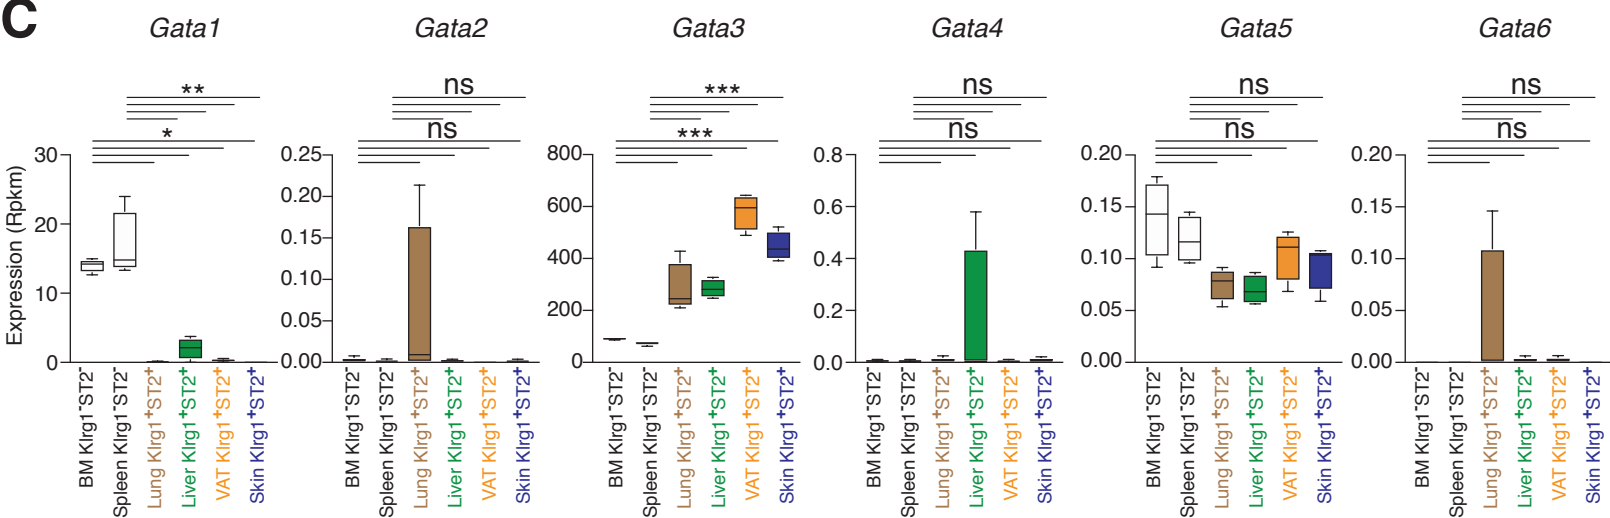

## D

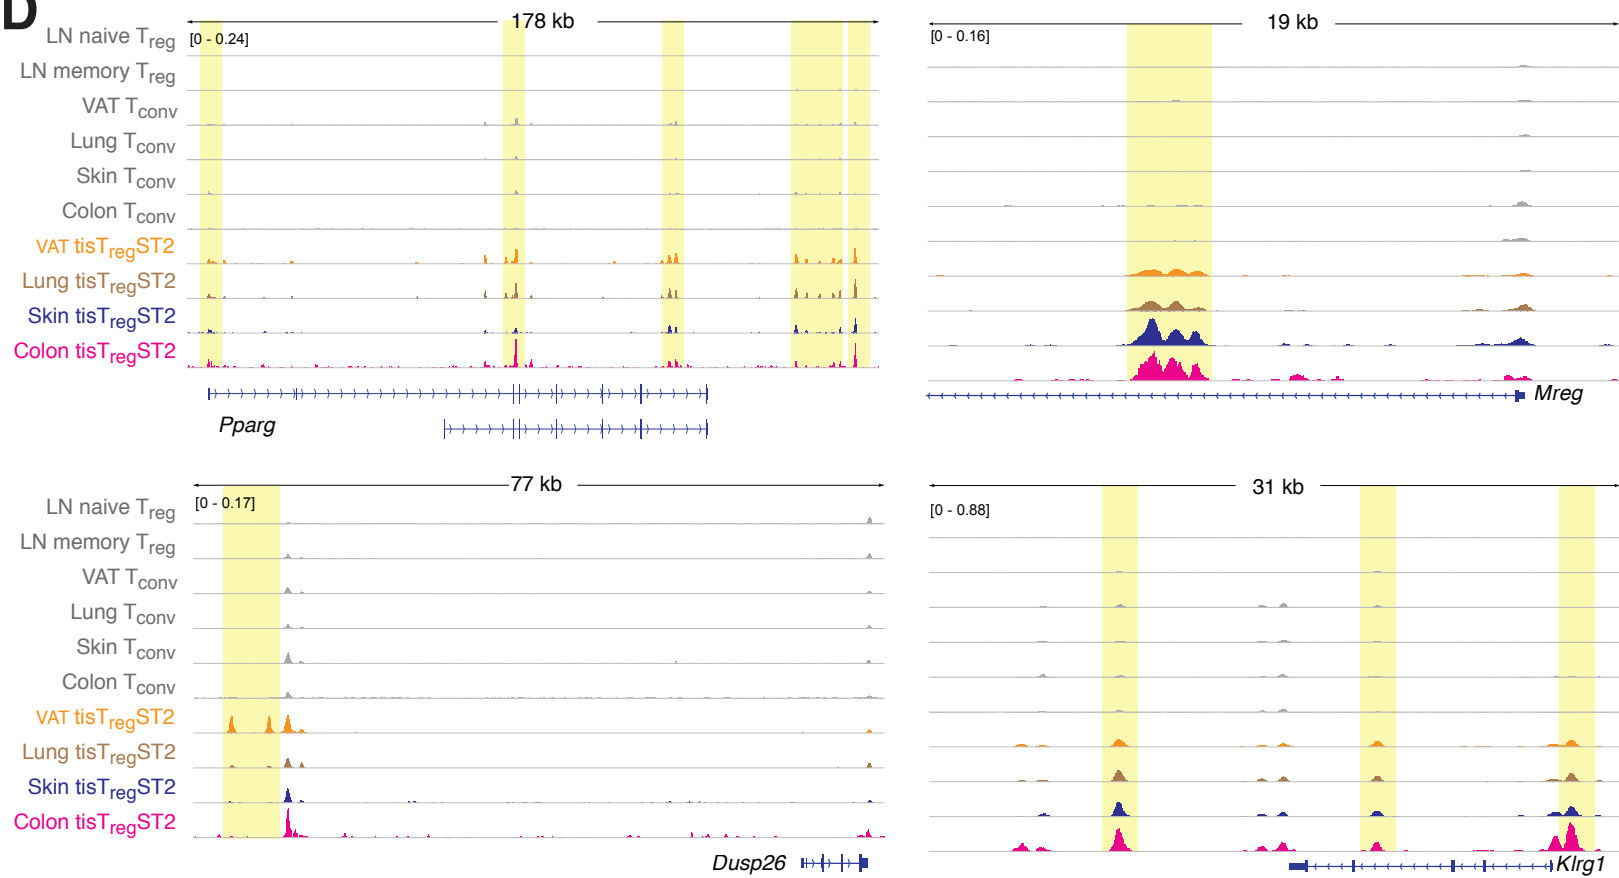

**Figure S1. ATAC-seq and RNA-seq of tissue-derived T cells, related to Figure 1. (A)** Lung-derived  $Klrg1^+ST2^-$  Treg cells as well as lung  $Klrg1^+ST2^+$  tisTregST2 cells were FACS-sorted and subjected to ATAC-sequencing. Samples were normalized and reads for each sample in the “core tisTregST2” peak set derived from Figure 1D were counted. Heatmap with unsupervised clustering shows normalized ATAC signal with color code high (red) vs low (blue) (n=3-4). **(B)** *Batf1-3* gene expression in BM and spleen-derived  $Klrg1^+ST2^-$  Treg (black) as well as lung, liver, visceral adipose tissue (VAT), and skin-derived  $Klrg1^+ST2^+$  tisTregST2 (brown, green, orange and dark blue). Statistics based on Deseq2. Asterisks indicate statistical significance, with Benjamini-Hochberg correction, \*\*\* $p < 0.001$ , \*\* $p < 0.01$ , \* $p < 0.05$  and ns  $p > 0.05$ ) (n=3-4). **(C)** *Gata1-6* gene expression in BM and spleen-derived  $Klrg1^+ST2^-$  Treg (black) as well as liver, lung, VAT, and skin-derived  $Klrg1^+ST2^+$  tisTregST2 (brown, green, orange, and dark blue). Colors indicate cell type (n=3-4). **(D)** ATAC-seq data for the *Klrg1*, *Pparg*, *Mreg* and *Dusp26* gene loci from lymph node (LN)-derived  $CD25^+Foxp3(GFP)^+CD44^-$  naive Treg, LN-derived  $CD25^+Foxp3(GFP)^+CD44^+$  memory Treg as well as VAT, lung, skin and colon-derived  $CD25^-Foxp3(GFP)^-CD44^+$  memory Tconv or  $CD25^+Foxp3(GFP)^+CD44^+Klrg1^+ST2^+$  tisTregST2 (n=4). Y-axis ATAC signal intensity, x-axis gene structure, with exons indicated as heightened bars and introns as line, arrows indicate gene direction. All datasets group-normalized to maximum peak height indicated in brackets. Overall display length indicated on top in kilobases (kb). Yellow box indicates area of interest. Data representative of two or more independent experiments or cell sorts.

# Figure S2

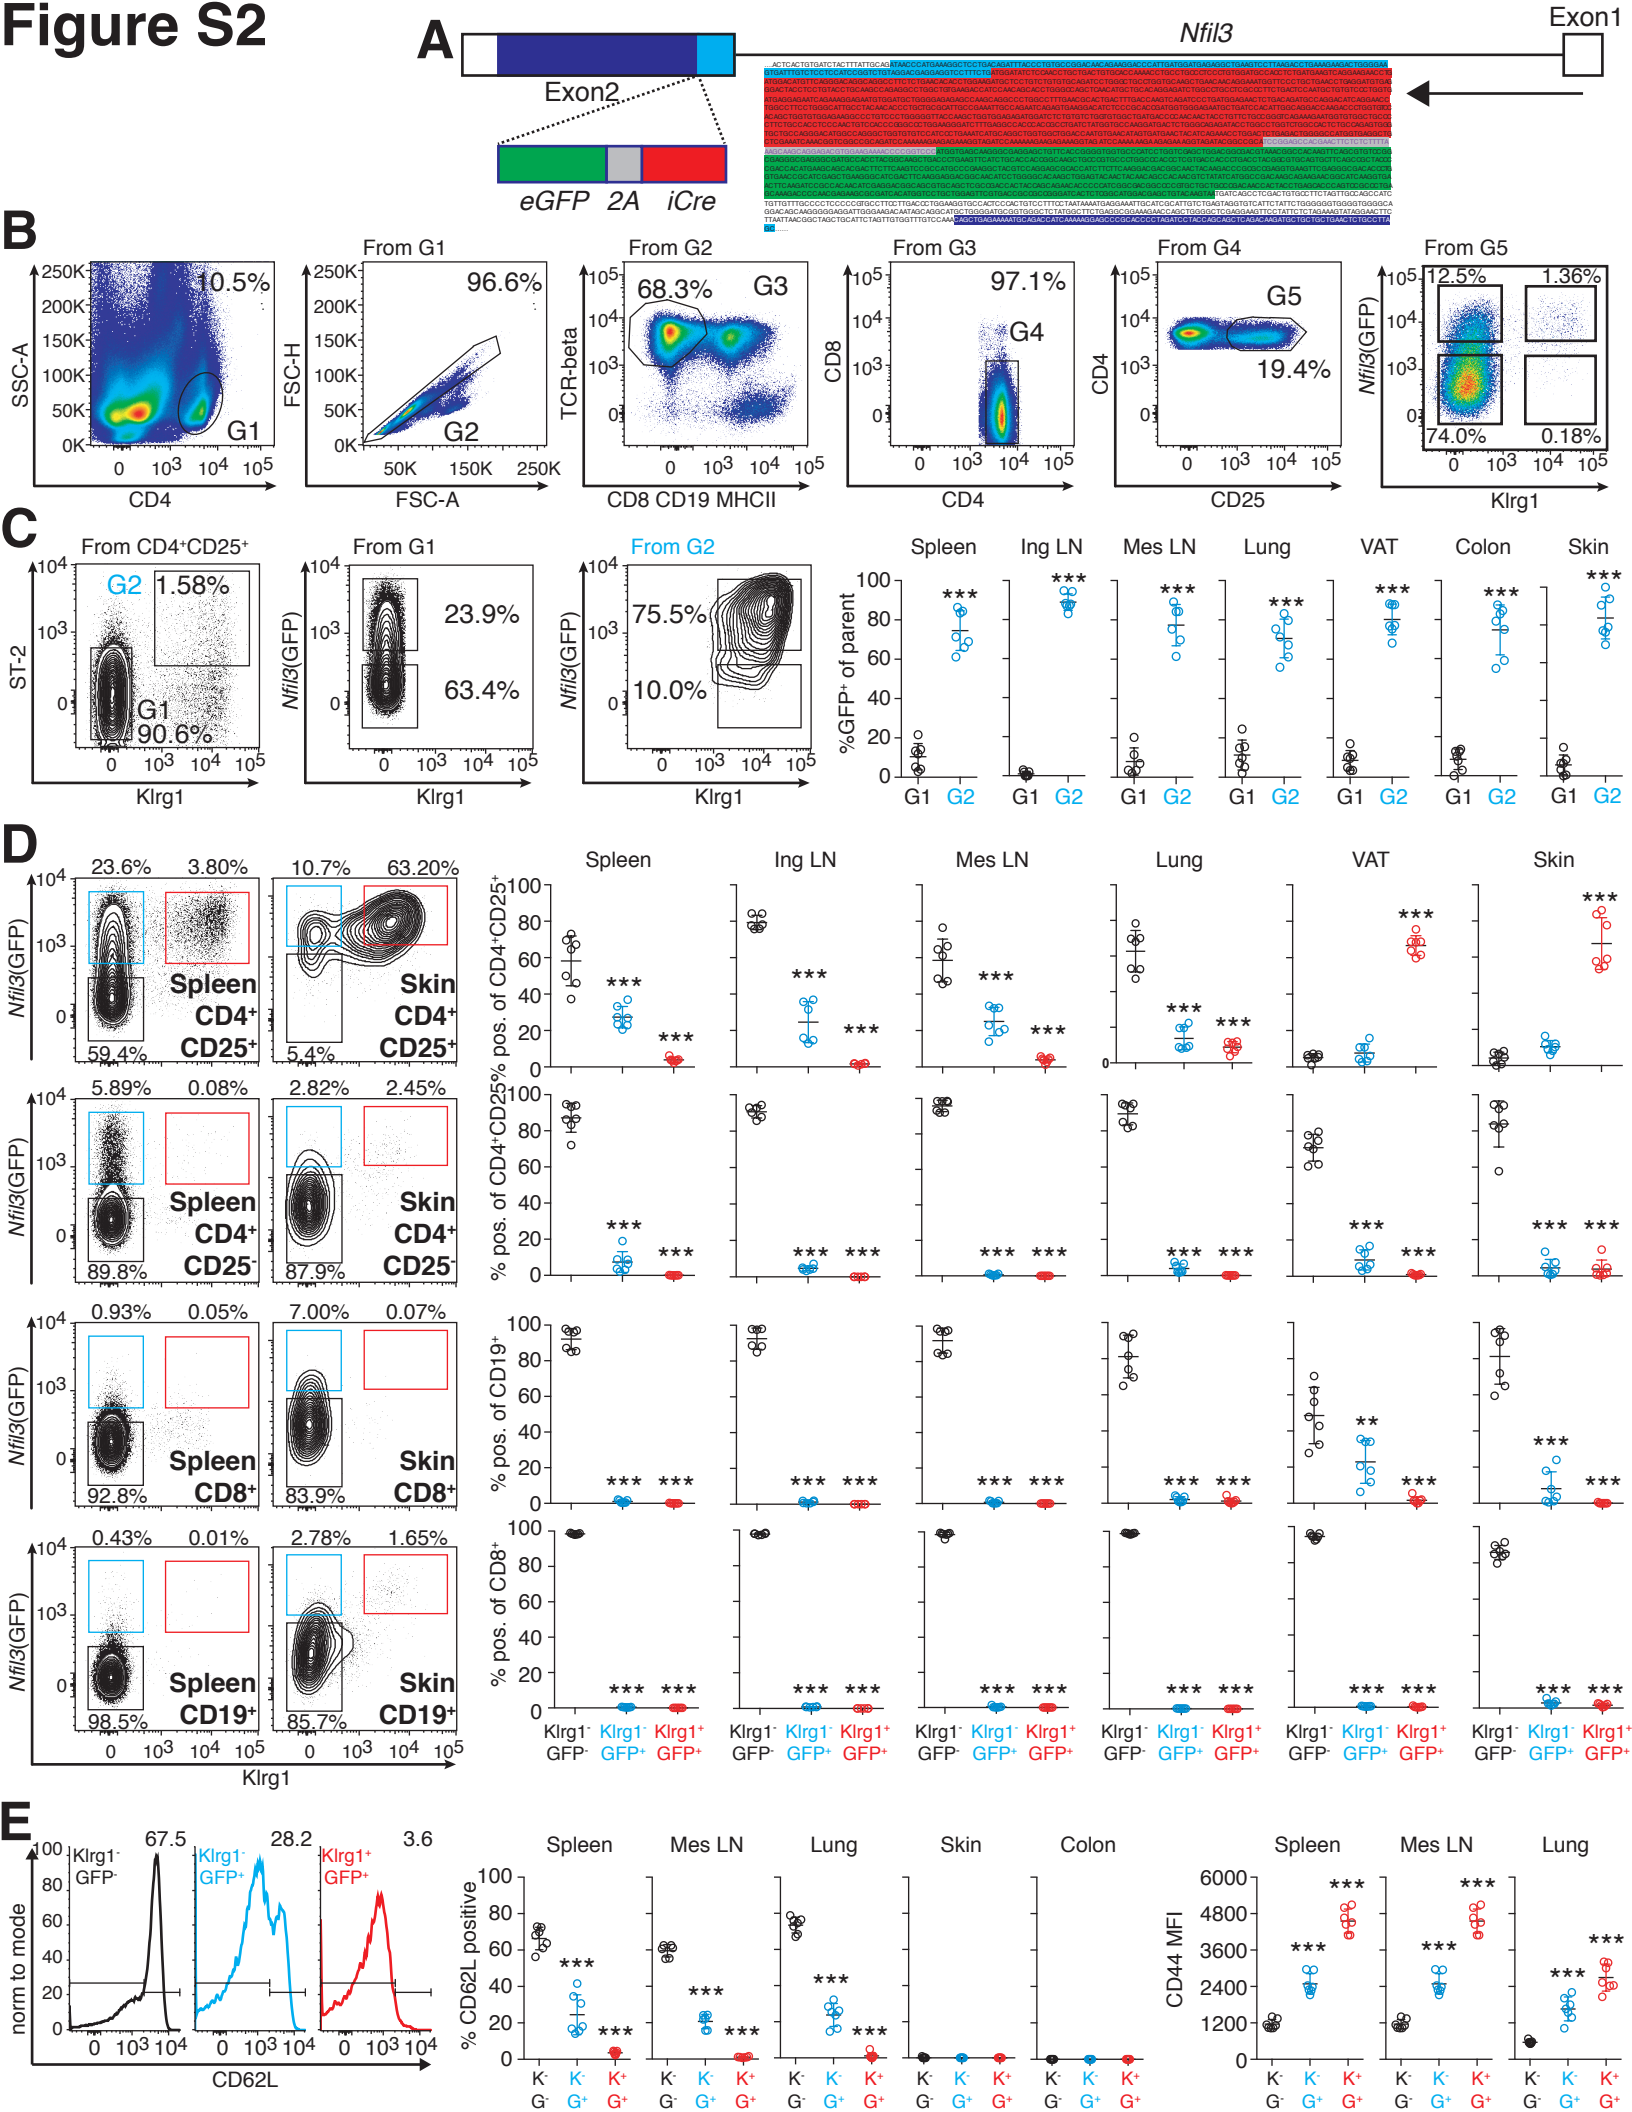

**Figure S2. Nfil3-GFP reporter mouse, related to Figure 2. (A)** Overview of insert into the BAC construct used for generating the *Nfil3*<sup>GFP</sup> reporter mouse. A fusion construct composed of the DNA for *iCre* (red), *2A* (grey), and *eGFP* (green) was generated, and inserted at the start codon of the *Nfil3* gene in the BAC RP23-227M5 using *Escherichia coli* DH10B. Top, gene structure and insertion site. Bottom, DNA code inserted into BAC. **(B)** Gating strategy used to identify Treg cells in *Nfil3*<sup>GFP</sup> reporter or control mice (data derived from lymph node). G1: CD4<sup>+</sup> T cells; G2: single cells; G3: CD8<sup>-</sup>CD19<sup>-</sup>MHCII<sup>-</sup>Dead<sup>-</sup>TCRbeta<sup>+</sup> T cells; G4: CD4<sup>+</sup>CD8<sup>-</sup> T cells; G5: CD4<sup>+</sup>CD25<sup>+</sup> Treg cells. **(C)** Expression of *Nfil3*(GFP) in Klrp1<sup>+</sup>ST2<sup>+</sup> tisTregST2 (G2) vs Klrp1<sup>-</sup>ST2<sup>-</sup> Treg cells (G1) from various tissues (paired t test, ing LN = inguinal LN; mes LN = mesenteric LN, n=7). **(D)** Presence of Klrp1<sup>+</sup>*Nfil3*(GFP)<sup>+</sup> Treg cells (red gate), Klrp1<sup>-</sup>*Nfil3*(GFP)<sup>+</sup> Treg cells (light blue gate), and Klrp1<sup>-</sup>*Nfil3*(GFP)<sup>-</sup> Treg cells (black gate) in different cell populations. First row: CD4<sup>+</sup>CD25<sup>+</sup> Treg cells; Second row: CD4<sup>+</sup>CD25<sup>-</sup> Tconv cells; Third row: CD8<sup>+</sup> cytotoxic T cells; Fourth row: CD19<sup>+</sup> B cells. Contour plots to the left show presence of populations in spleen or skin. Additional data points, tissues and statistical evaluation shown in the graphs to the right (one-way ANOVA with Tukey correction, n=7). **(E)** Memory phenotype of Klrp1<sup>-</sup>*Nfil3*(GFP)<sup>-</sup> Treg cells (black), Klrp1<sup>-</sup>*Nfil3*(GFP)<sup>+</sup> Treg cells (blue) and Klrp1<sup>+</sup>*Nfil3*(GFP)<sup>+</sup> Treg cells (red). Left, histograms illustrating expression of CD62L in spleen-derived Treg cell populations. Middle, additional data points, tissues and statistical evaluation (one-way ANOVA with Tukey correction, n=7). Right, CD44 MFI for Treg populations in spleen, mes LN and lung (one-way ANOVA with Tukey correction, n=7). Data representative of two or more independent experiments or cell sorts.

# Figure S3

● T<sub>reg</sub> spleen Klrp1<sup>-</sup>Nfil3<sup>-</sup> ● T<sub>reg</sub> spleen Klrp1<sup>-</sup>Nfil3<sup>+</sup> ● T<sub>reg</sub> spleen Klrp1<sup>+</sup>Nfil3<sup>+</sup>

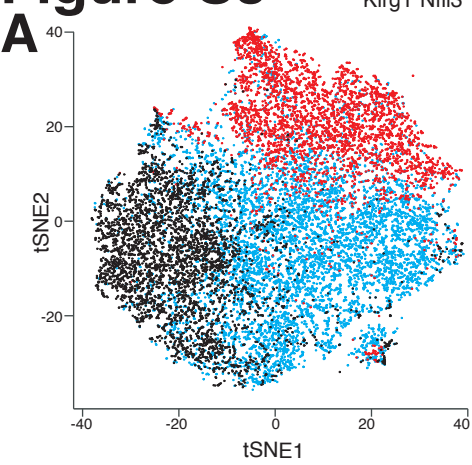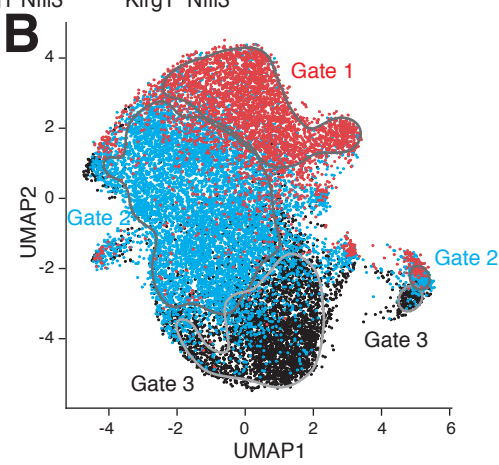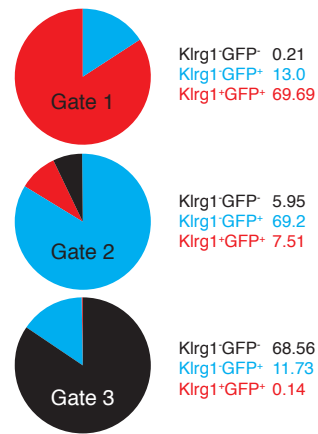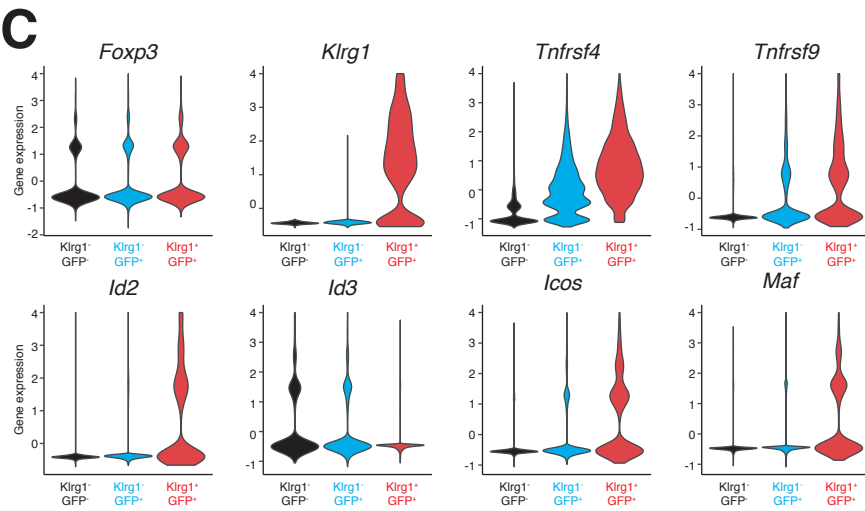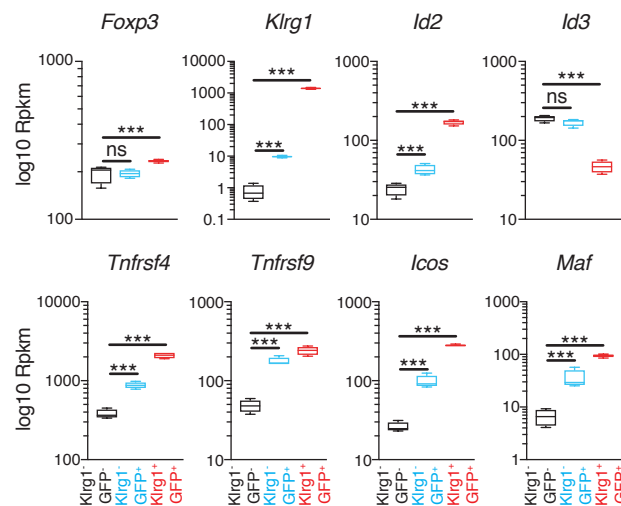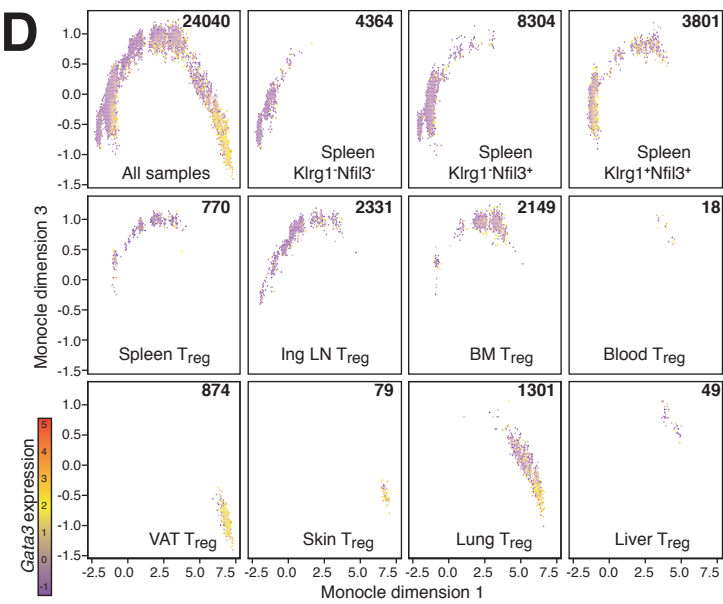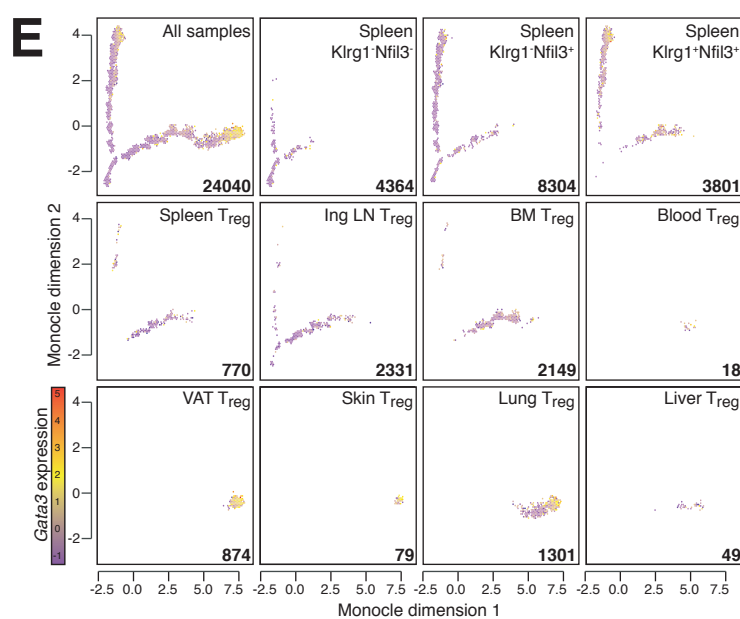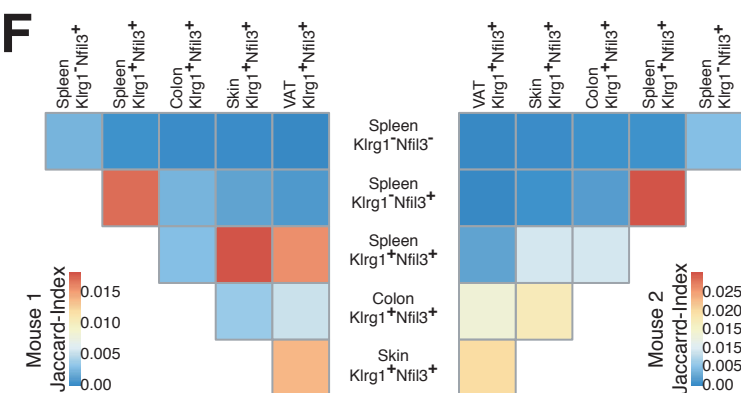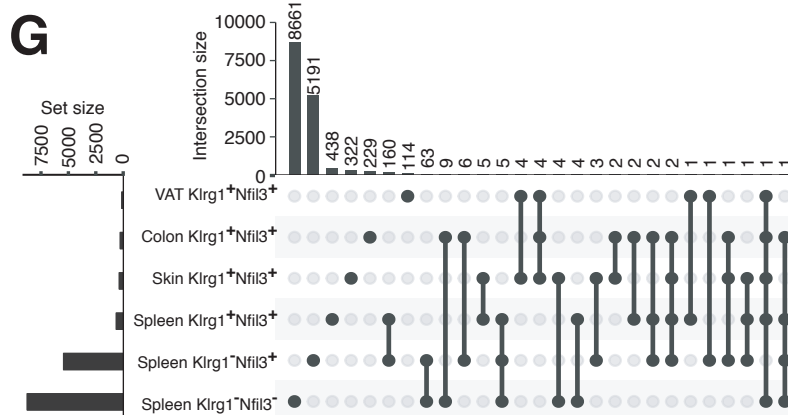

**Figure S3. ScRNA-seq and scTCR-seq of tissue T cells, related to Figure 2+3.** (A) t-Distributed Stochastic Neighbor Embedding (t-SNE) of single-cell RNA-sequencing data of spleen-derived Treg cell (CD4<sup>+</sup>TCRβ<sup>+</sup>CD25<sup>+</sup>) subpopulations: Klrp1<sup>-</sup>*Nfil3*(GFP)<sup>-</sup> in black, Klrp1<sup>-</sup>*Nfil3*(GFP)<sup>+</sup> in blue, and Klrp1<sup>+</sup>*Nfil3*(GFP)<sup>+</sup> in red (n=5). (B) Uniform manifold approximation and projection (UMAP) of single-cell RNA-sequencing data of spleen-derived Treg cell (CD4<sup>+</sup>TCRβ<sup>+</sup>CD25<sup>+</sup>) subpopulations as in (A). Contour gates were drawn to include 70% of the parent population (Gate 1-3). Contribution of cell types to Gate1-3 shown in the pie charts to the right (n=5). (C) Violin plots illustrating the expression of *Foxp3*, *Klrp1*, *Id2*, *Id3*, *Tnfrsf4*, *Tnfrsf9*, *Icos*, and *Maf* in Klrp1<sup>-</sup>*Nfil3*(GFP)<sup>-</sup> Treg, Klrp1<sup>-</sup>*Nfil3*(GFP)<sup>+</sup> Treg, and Klrp1<sup>+</sup>*Nfil3*(GFP)<sup>+</sup> Treg as in (F-G). Violin plots were scaled by width resulting in the same maximum width for all violins. Right, gene expression data of Klrp1<sup>-</sup>*Nfil3*(GFP)<sup>-</sup> Treg cells (black), Klrp1<sup>-</sup>*Nfil3*(GFP)<sup>+</sup> Treg cells (blue) and Klrp1<sup>+</sup>*Nfil3*(GFP)<sup>+</sup> Treg cells (red) for *Foxp3*, *Klrp1*, *Id2*, *Id3*, *Tnfrsf4*, *Tnfrsf9*, *Icos*, and *Maf*. Statistics based on Deseq2 (n=4). (D) Monocle plots derived from scRNA-seq data of spleen Klrp1<sup>-</sup>*Nfil3*(GFP)<sup>-</sup> Treg, spleen Klrp1<sup>-</sup>*Nfil3*(GFP)<sup>+</sup> Treg, spleen Klrp1<sup>+</sup>*Nfil3*(GFP)<sup>+</sup> Treg as well as spleen, inguinal LN (ing LN), bone marrow, blood, VAT, skin, lung, and liver memory Treg (CD4<sup>+</sup>TCRβ<sup>+</sup>CD44<sup>+</sup>CD25<sup>+</sup>*Foxp3*(GFP)<sup>+</sup>). Color code indicates expression of *Gata3*. X-axis and y-axis indicate monocle dimension 1 and 3. Each dot represents a hexagonal bin, and each dot is colored by the mean expression value of *Gata3* of the cells that are within the hexagonal bin. (E) Pseudotime plot as in (A) with monocle dimension 1 and dimension 2. (F) Data derived from scTCR-seq of spleen Klrp1<sup>-</sup>*Nfil3*(GFP)<sup>-</sup> Treg, spleen Klrp1<sup>-</sup>*Nfil3*(GFP)<sup>+</sup> Treg, spleen Klrp1<sup>+</sup>*Nfil3*(GFP)<sup>+</sup> Treg as well as colon, skin, and VAT-derived Klrp1<sup>+</sup>*Nfil3*(GFP)<sup>+</sup> tisTregST2 from two individual mice. Graphical representation of similarity coefficients between these samples based on Jaccard Index for both experiments. Color indicates similarity with low (blue) to high (red) (n=2). (G) Data derived from scTCR-seq of VAT, colon and skin-derived Klrp1<sup>+</sup>*Nfil3*(GFP)<sup>+</sup> tisTregST2 as well as spleen Klrp1<sup>+</sup>*Nfil3*(GFP)<sup>+</sup> Treg, spleen Klrp1<sup>-</sup>*Nfil3*(GFP)<sup>+</sup> Treg, and spleen Klrp1<sup>-</sup>*Nfil3*(GFP)<sup>-</sup> Treg from an individual mouse. Set size enumerates total number of successfully identified TCR α+β chains (left). To the right, individual clones and shared clones between all groups are displayed. On top, the total number of shared clones is displayed and numbered (n=2).\_Data representative of two or more independent experiments or cell sorts.

# Figure S4

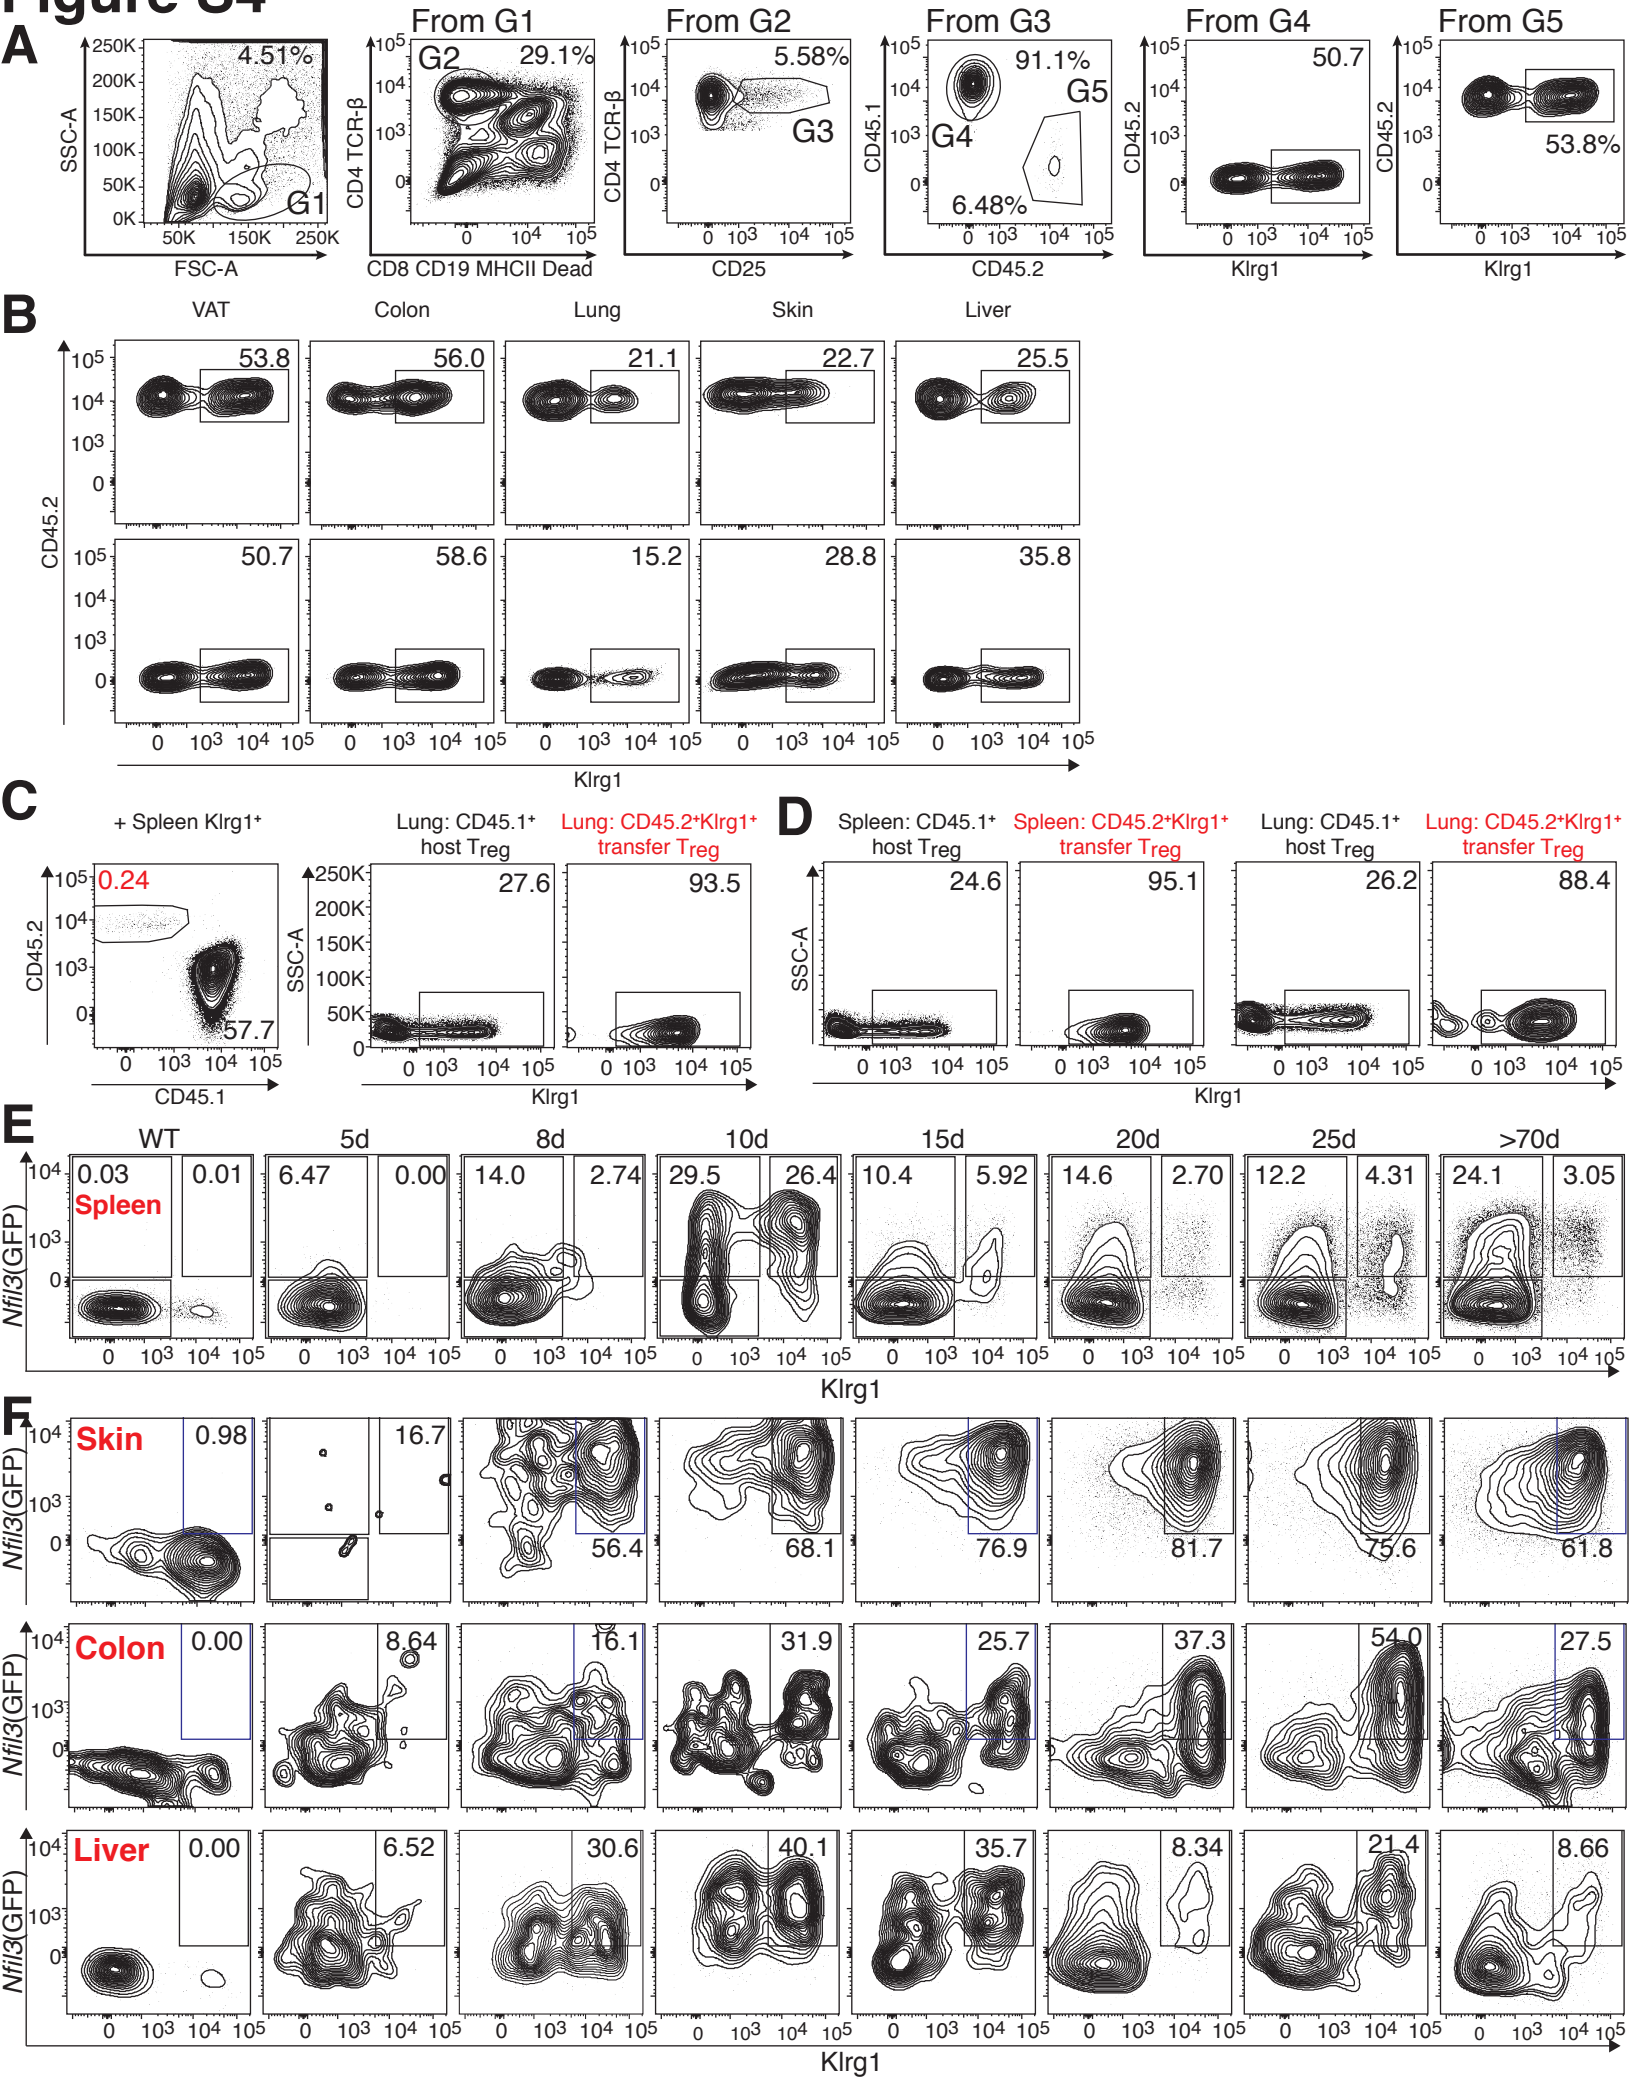



**Figure S4. Adoptive transfer and development, related to Figure 4. (A)** Gating strategy used to identify transferred and host Treg cells in DT-treated host animals. G1: Lymphocytes; G2: CD8<sup>-</sup>CD19<sup>-</sup>MHCII<sup>-</sup>Dead<sup>-</sup>TCRbeta<sup>+</sup>CD4<sup>+</sup> T cells; G3: TCRbeta<sup>+</sup>CD4<sup>+</sup>CD25<sup>+</sup> Treg cells; G4: CD45.1<sup>+</sup>CD45.2<sup>-</sup> host Treg cells; G5: CD45.1<sup>-</sup>CD45.2<sup>+</sup> transferred Treg cells. Two plots to the right illustrate expression of Klrp1 in CD45.1<sup>+</sup>CD45.2<sup>-</sup> host Treg cells and CD45.1<sup>-</sup>CD45.2<sup>+</sup> transferred Treg cells. **(B)** Identification of transferred Treg cells in tissues of recipient animals 10 days after transfer of CD45.2<sup>+</sup> Klrp1<sup>-</sup>*Nfil3*(GFP)<sup>+</sup> Treg cells. Contour plots illustrate expression of Klrp1 in transferred Treg (top) or host Treg (bottom). **(C)** Identification of transferred Treg cells in lung tissue of recipient animals 10 days after transfer of spleen-derived CD45.2<sup>+</sup>Klrp1<sup>-</sup>*Nfil3*(GFP)<sup>+</sup> Treg cells. Contour plots illustrate expression of Klrp1 in transferred and host Treg. **(D)** Identification of transferred Treg cells in spleen, mesenteric LN (Mes) and lung tissue of recipient animals 10 days after transfer of lung-derived CD45.2<sup>+</sup>Klrp1<sup>-</sup>*Nfil3*(GFP)<sup>+</sup> Treg cells. Contour plots illustrate expression of Klrp1 in transferred and host Treg. **(E)** Representative examples of spleen Klrp1<sup>-</sup>*Nfil3*(GFP)<sup>+</sup> and Klrp1<sup>+</sup>*Nfil3*(GFP)<sup>+</sup> Treg cells 5d, 8d, 10d, 15d, 20d, 25d, and 70+d after birth. Pre-gate on CD8<sup>-</sup>CD19<sup>-</sup>MHCII<sup>-</sup>Dead<sup>-</sup>TCRbeta<sup>+</sup>CD4<sup>+</sup>CD25<sup>+</sup> Treg cells. **(F)** Representative examples of skin, colon and liver Klrp1<sup>+</sup>*Nfil3*(GFP)<sup>+</sup> Treg cells 5d, 10d, 12d, 15d, 20d, 25d, and 70+d after birth. Pre-gate on CD8<sup>-</sup>CD19<sup>-</sup>MHCII<sup>-</sup>Dead<sup>-</sup>TCRbeta<sup>+</sup>CD4<sup>+</sup>CD25<sup>+</sup> Treg cells. For skin, lung and colon contour plots, flow cytometry data of several replicates were concatenated to increase visibility. Data representative of two or more independent experiments, n=3-19 per group for each experiment.

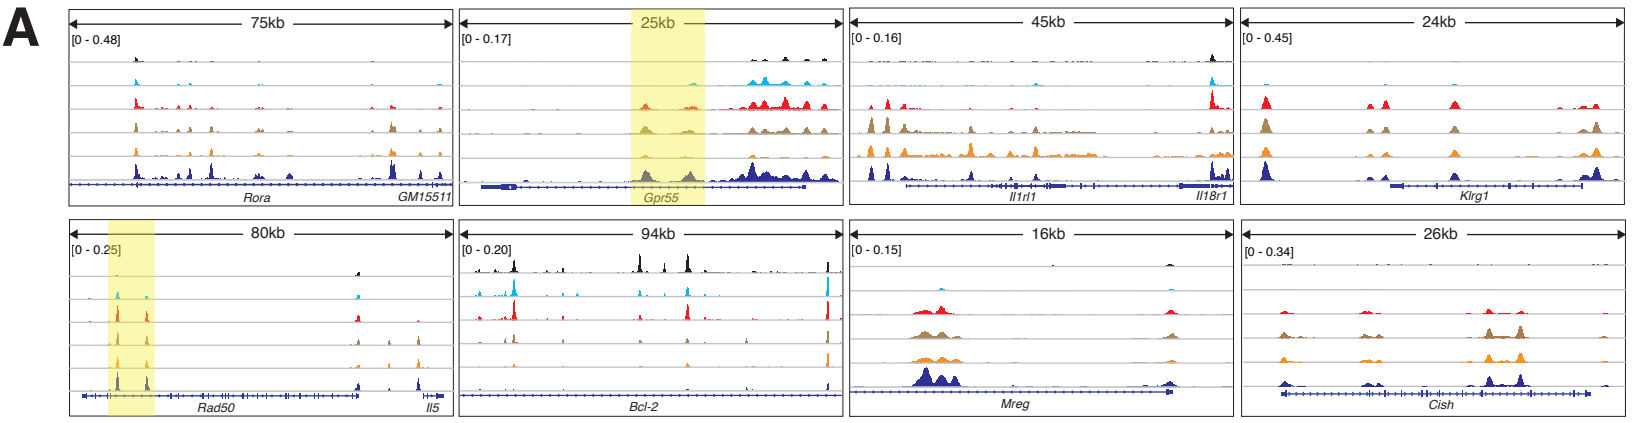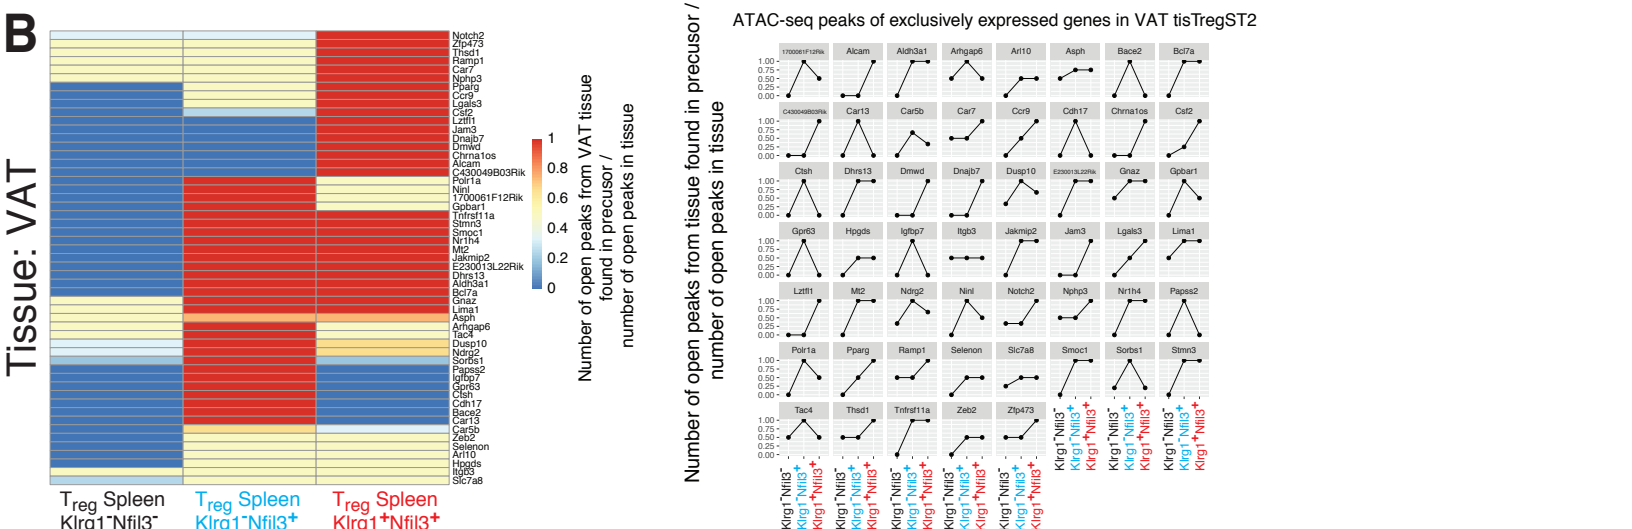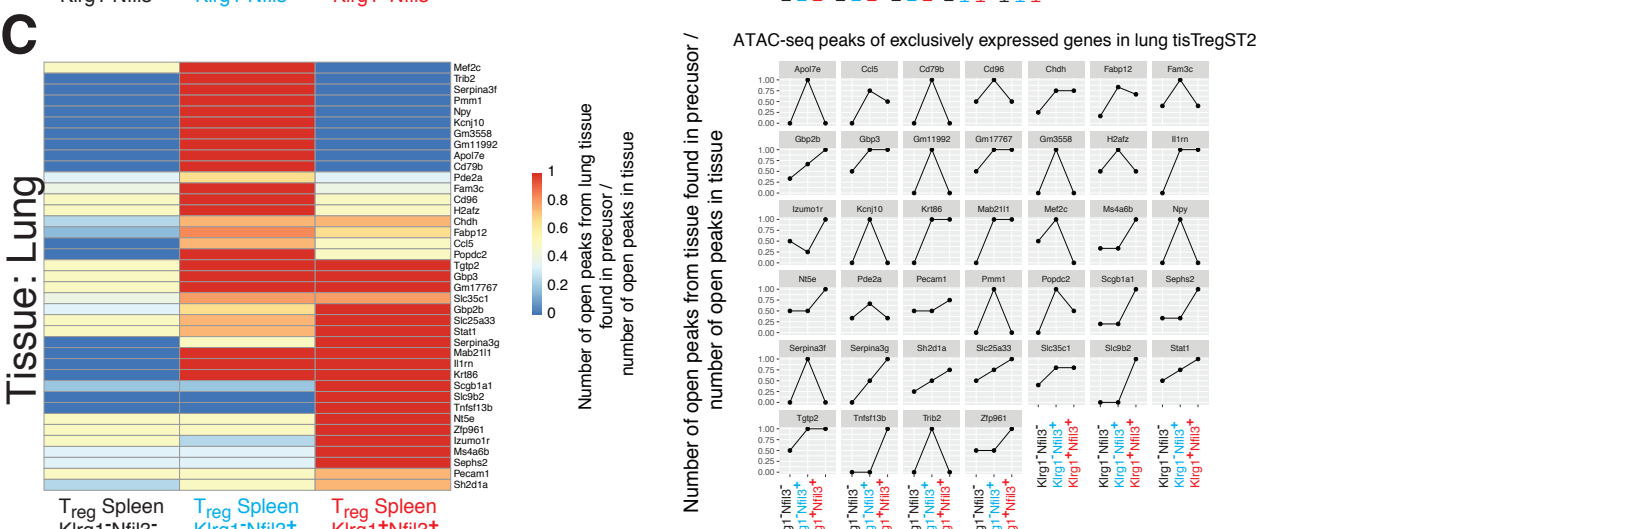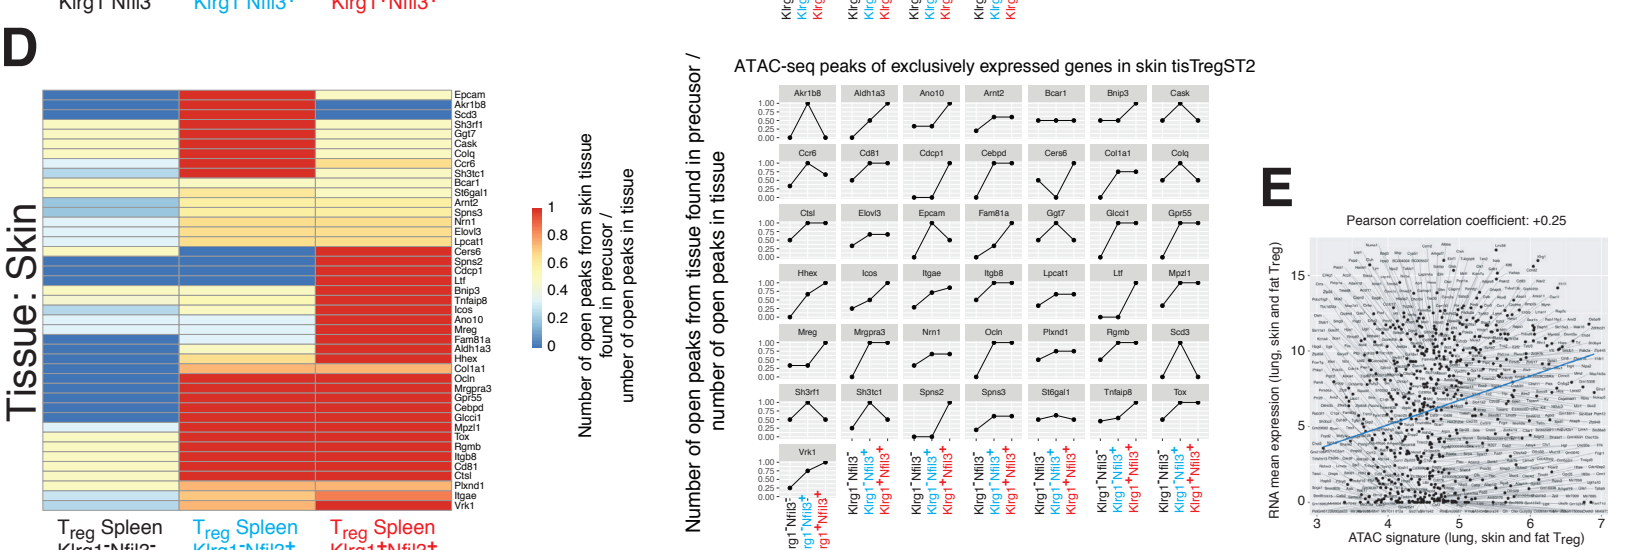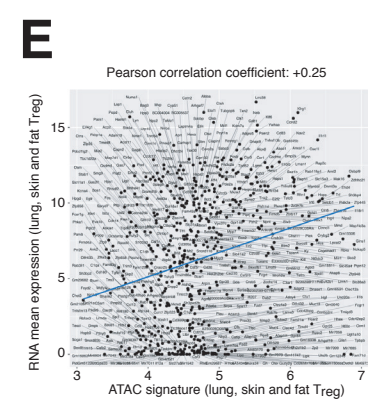

**Figure S5. ATAC-seq of tissue T cells, related to Figure 5. (A)** ATAC-seq data for parts of the *Rora*, *Gpr55*, *Rad50*, *Bcl2*, *Il1rl1*, *Klrg1*, *Mreg* and *Cish* gene loci of spleen-derived *Klrg1<sup>-</sup>Nfil3(GFP)<sup>-</sup>* Treg cells (black), spleen *Klrg1<sup>-</sup>Nfil3(GFP)<sup>+</sup>* Treg cells (light blue), spleen *Klrg1<sup>+</sup>Nfil3(GFP)<sup>+</sup>* Treg cells (red) as well as lung, VAT, and skin-derived *CD25<sup>+</sup>Foxp3(GFP)<sup>+</sup>CD44<sup>+</sup>Klrg1<sup>+</sup>ST2<sup>+</sup>* tisTregST2 (light brown, orange, dark blue). Y-axis ATAC signal intensity, x-axis gene structure, with exons indicated as heightened bars and introns as line, arrows indicate gene direction. All datasets group-normalized to maximum peak height indicated in brackets. Overall display length indicated on top in kilobases (kb) (n=4). **(B)** Left, heatmap illustrating number of open peaks from VAT tisTregST2 cells found in precursor/number of open peaks in VAT tissue for three groups spleen-derived *Klrg1<sup>-</sup>Nfil3(GFP)<sup>-</sup>* Treg cells (black), spleen *Klrg1<sup>-</sup>Nfil3(GFP)<sup>+</sup>* Treg cells (light blue), spleen *Klrg1<sup>+</sup>Nfil3(GFP)<sup>+</sup>* Treg cells (red). X-axis sample type, y-axis gene name. To the right, ATAC-seq peaks of exclusively expressed genes from VAT tisTregST2 for three groups spleen-derived *Klrg1<sup>-</sup>Nfil3(GFP)<sup>-</sup>* Treg cells (black), spleen *Klrg1<sup>-</sup>Nfil3(GFP)<sup>+</sup>* Treg cells (light blue) and spleen *Klrg1<sup>+</sup>Nfil3(GFP)<sup>+</sup>* Treg cells (red). X-axis sample type, y-axis number of open peaks from tissue found in precursor/number of open peaks in tissue (n=4). **(C)** Heatmap illustrating number of open peaks from lung tisTregST2 found in precursor/number of open peaks in lung tissue for three groups as in (B) (n=4). **(D)** Heatmap illustrating number of open peaks from skin tisTregST2 found in precursor/number of open peaks in skin tissue for three groups as in (B) (n=4). **(E)** Correlation between common ATAC signature (Lung, skin and VAT Treg) and RNA expression (lung, skin and VAT Treg); 10kb distance to gene (n=4). Data representative of two or more independent experiments or cell sorts.

# Figure S6

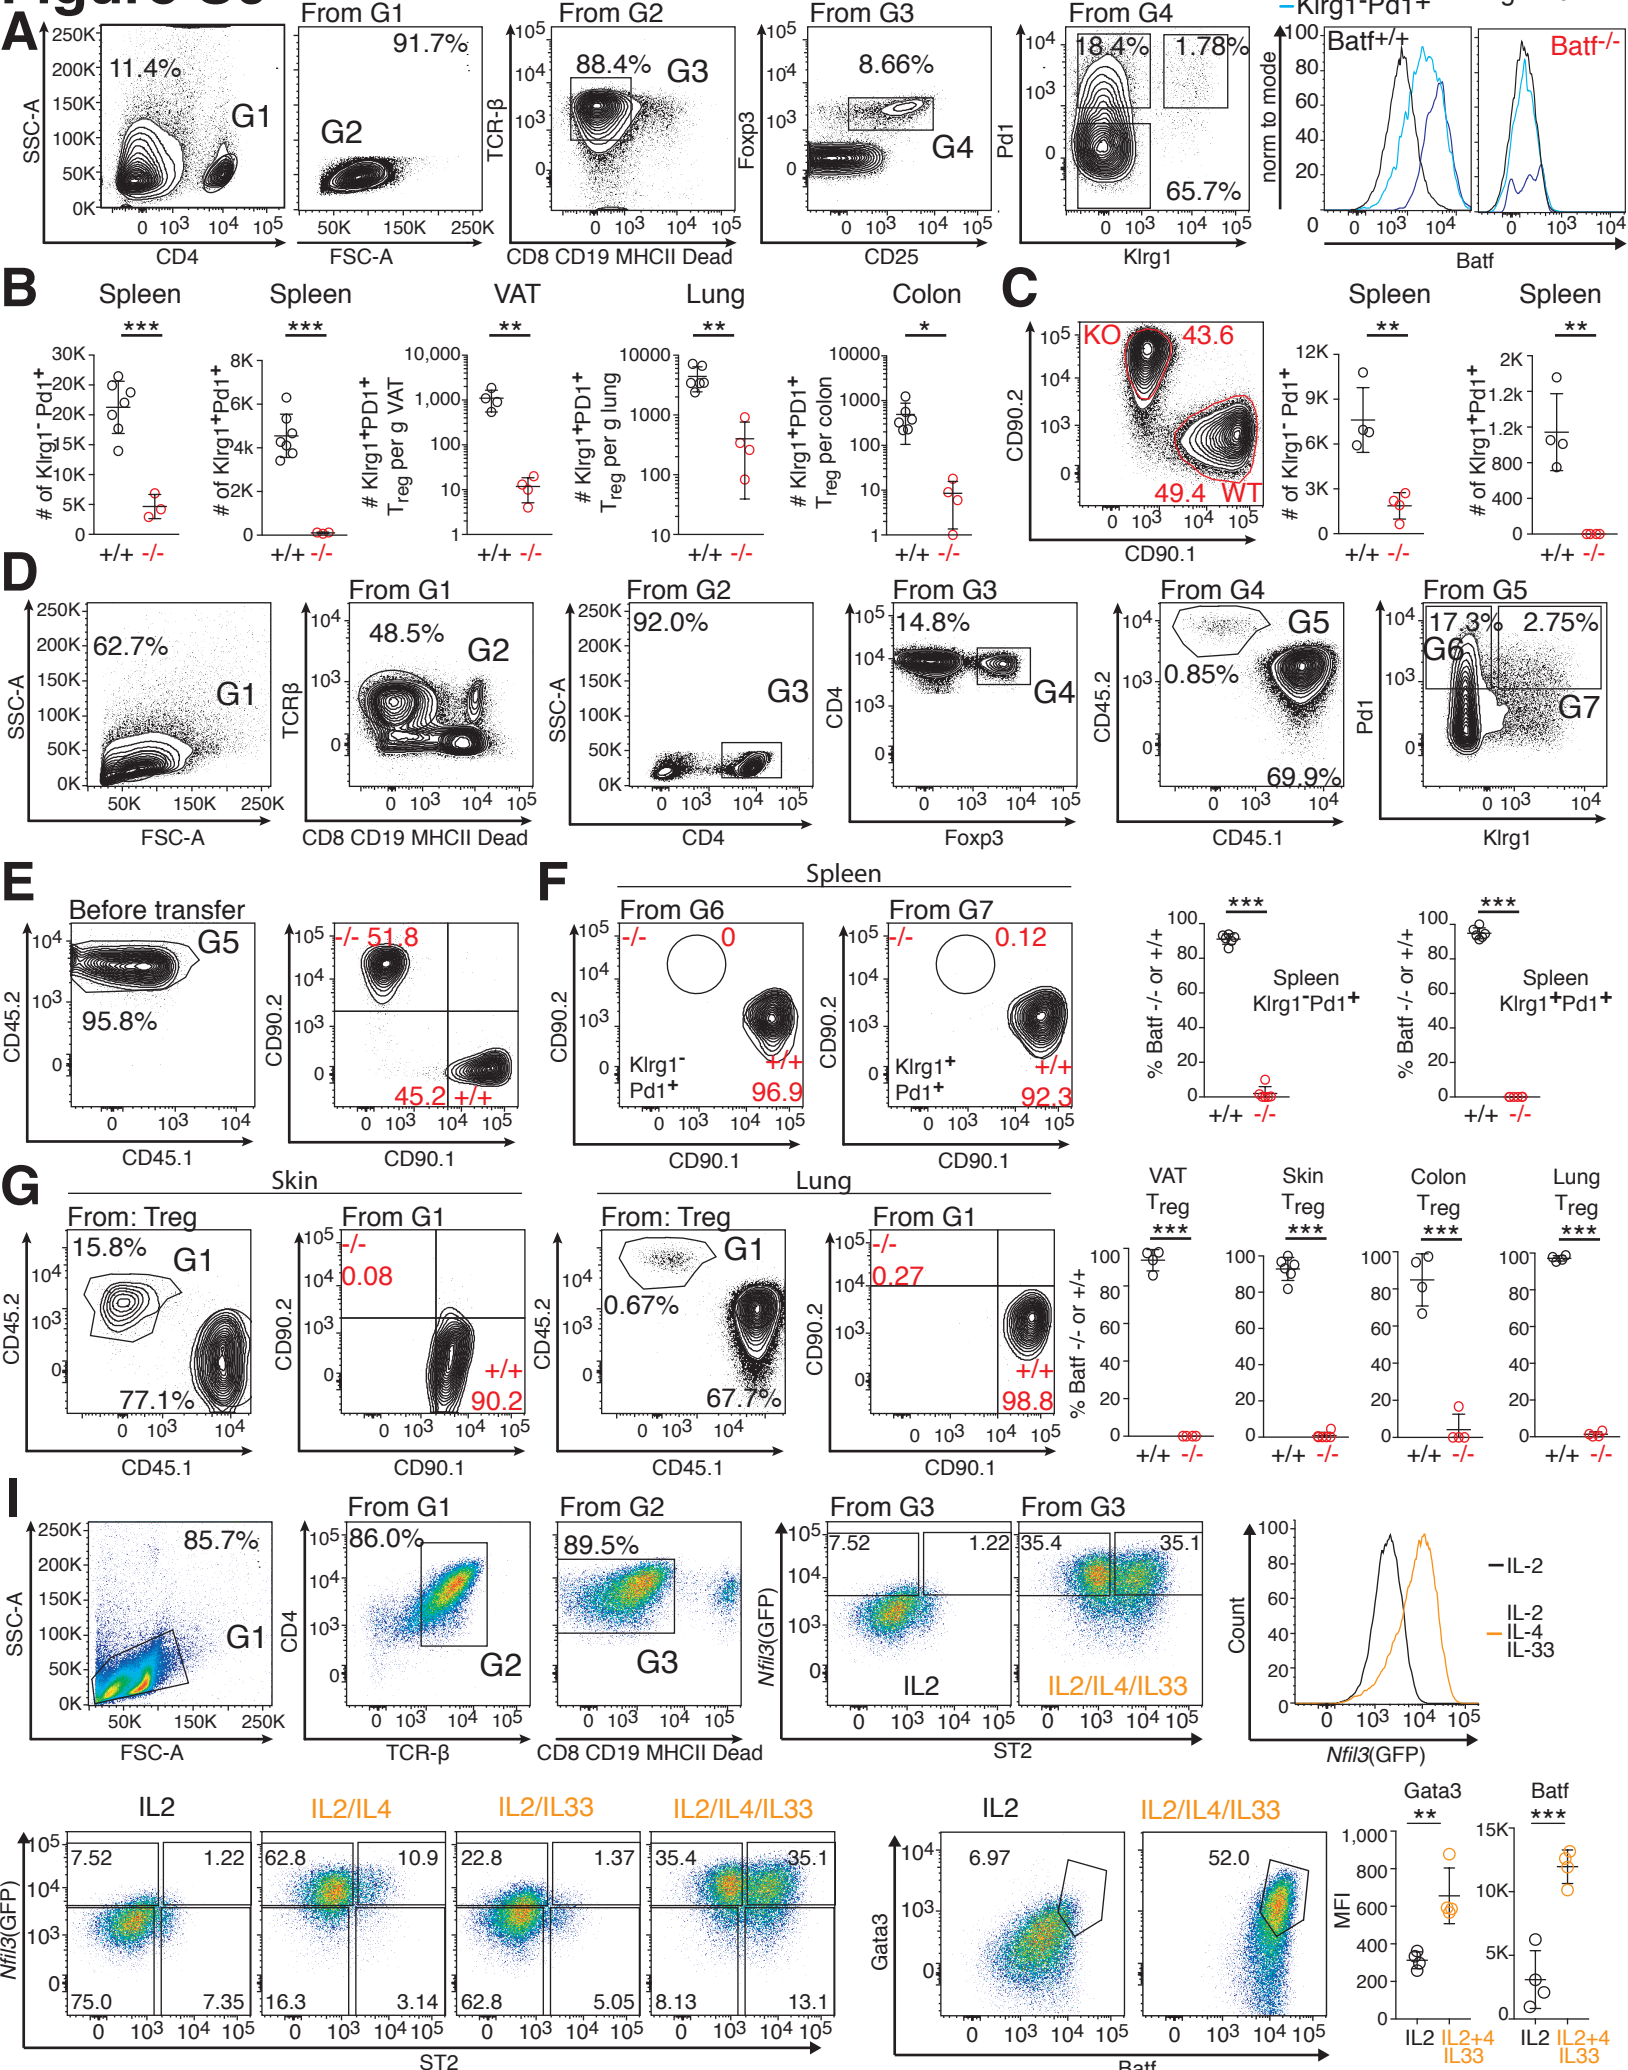

**Figure S6. Batf and tissue Treg development, related to Figure 7. (A)** Gating strategy used to identify Klrp1<sup>-</sup>Pd1<sup>-</sup>, Klrp1<sup>-</sup>Pd1<sup>+</sup> or Klrp1<sup>+</sup>Pd1<sup>+</sup> Treg cells in Batf<sup>-/-</sup> vs Batf<sup>+/+</sup> mice. G1: CD4<sup>+</sup> T cells; G2: lymphocytes; G3: CD8<sup>-</sup>CD19<sup>-</sup>MHCII<sup>-</sup>Dead<sup>-</sup>TCRbeta<sup>+</sup> T cells; G4: CD4<sup>+</sup>CD25<sup>+</sup> Treg cells. From G4, Klrp1<sup>-</sup>Pd1<sup>-</sup>, Klrp1<sup>-</sup>Pd1<sup>+</sup> or Klrp1<sup>+</sup>Pd1<sup>+</sup> Treg cells can be identified. Expression of Batf in all three populations of Batf<sup>-/-</sup> vs Batf<sup>+/+</sup> mice is shown as histogram to the right. **(B)** Total numbers of Klrp1<sup>-</sup>Pd1<sup>+</sup> or Klrp1<sup>+</sup>Pd1<sup>+</sup> Treg cells in spleens of Batf<sup>-/-</sup> vs Batf<sup>+/+</sup> mice (n=3-7, unpaired t-test). Right, total number of Klrp1<sup>+</sup>Pd1<sup>+</sup> Treg cells per g VAT, per g lung or per whole colon (unpaired t-test, n=4-6). **(C)** Total numbers of Klrp1<sup>-</sup>Pd1<sup>+</sup> or Klrp1<sup>+</sup>Pd1<sup>+</sup> Treg cells in spleens of mixed bone marrow chimeras with 50% Batf<sup>+/+</sup> and 50% Batf<sup>-/-</sup> bone marrow six weeks after bone marrow transfer (unpaired t-test, n=5). **(D)** Gating strategy to identify transferred CD45.1<sup>-</sup>CD45.2<sup>+</sup> Treg cells (mixed 50% CD90.1<sup>+</sup>CD90.2<sup>-</sup>Batf<sup>+/+</sup> and 50% CD90.1<sup>-</sup>CD90.2<sup>+</sup>Batf<sup>-/-</sup>) in DT-treated CD45.1<sup>+</sup>CD45.2<sup>-</sup> Foxp3<sup>DTR</sup> host animals two weeks after transfer. **(E)** Quality control of cells before transfer into congenic DT-treated recipient. **(F)** Presence of CD90.1<sup>+</sup>CD90.2<sup>-</sup>Batf<sup>+/+</sup> vs CD90.1<sup>-</sup>CD90.2<sup>+</sup>Batf<sup>-/-</sup> transferred Treg cells Klrp1<sup>-</sup>Pd1<sup>+</sup> or Klrp1<sup>+</sup>Pd1<sup>+</sup> Treg cells of spleens isolated from DT-treated host animals two weeks after transfer. Statistical verification across replicates to the right, gating (G6 and G7) derived from (E) (unpaired t test, n=4-6). **(G)** Presence of CD90.1<sup>+</sup>CD90.2<sup>-</sup>Batf<sup>+/+</sup> vs CD90.1<sup>-</sup>CD90.2<sup>+</sup>Batf<sup>-/-</sup> transferred Treg cells in lung or skin of DT-treated host animals two weeks after transfer with statistical verification across replicates (unpaired t test, n=4-6). **(I)** Gating strategy used to analyse Treg cells expanded with anti-CD3/28 microbeads and cytokines *in-vitro*. G1: lymphocytes; G2: CD4<sup>+</sup>TCRbeta<sup>+</sup> T cells; G3: CD8<sup>-</sup>CD19<sup>-</sup>MHCII<sup>-</sup>Dead<sup>-</sup>CD4<sup>+</sup> T cells. From G3, *Nfil3*(GFP)<sup>+</sup>ST2<sup>-</sup> or *Nfil3*(GFP)<sup>+</sup>ST2<sup>+</sup> Treg cells can be identified. Histogram to the right depicts *Nfil3*(GFP) expression in both groups. Below, expression of *Nfil3*(GFP) vs ST2 in expanded Treg cells treated with IL-2, IL-2/IL-4, IL-2/IL-33, or IL-2/IL-4/IL-33. To the right, expanded Treg cells with fixation and permeabilization to detect intracellular proteins. MFI of Gata3 or Batf was extracted (unpaired t test, n=4). Data representative of two or more independent experiments or cell sorts.

# Figure S7

## A

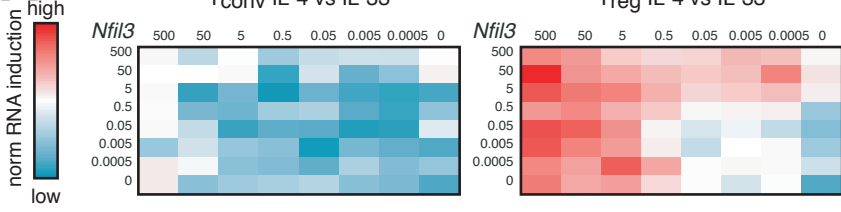

## C

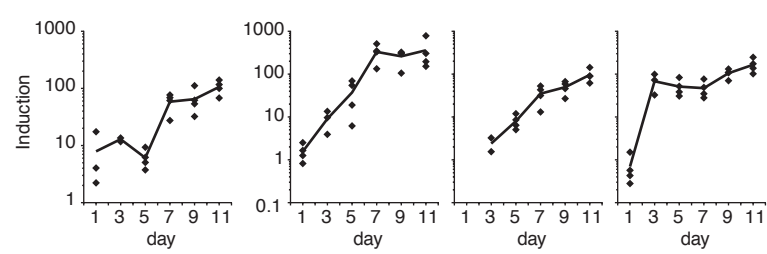

## B

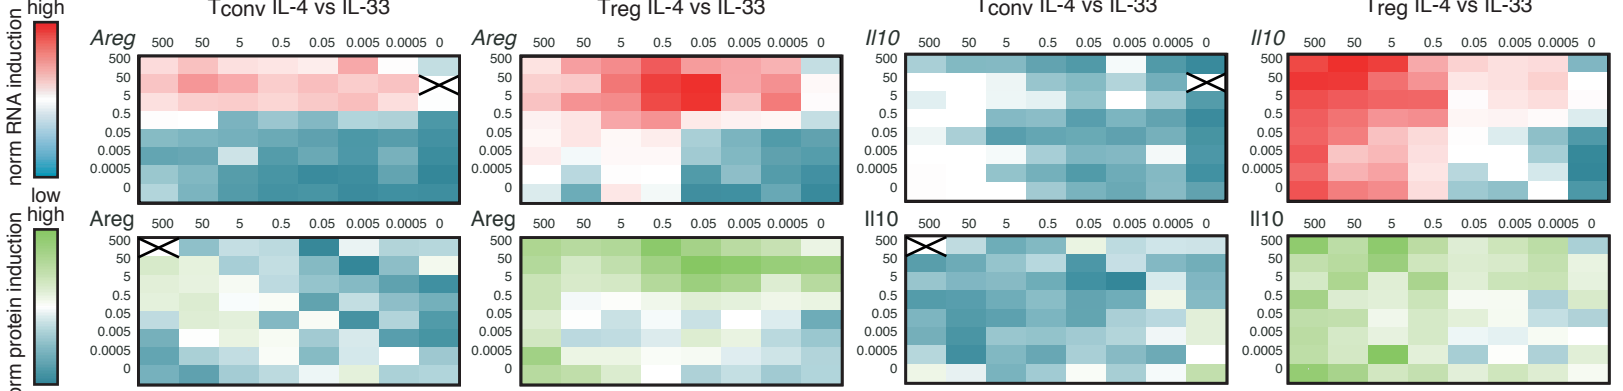

## D

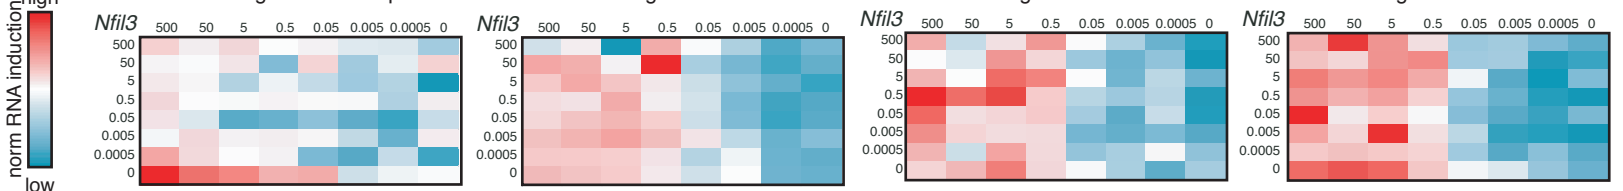

## E

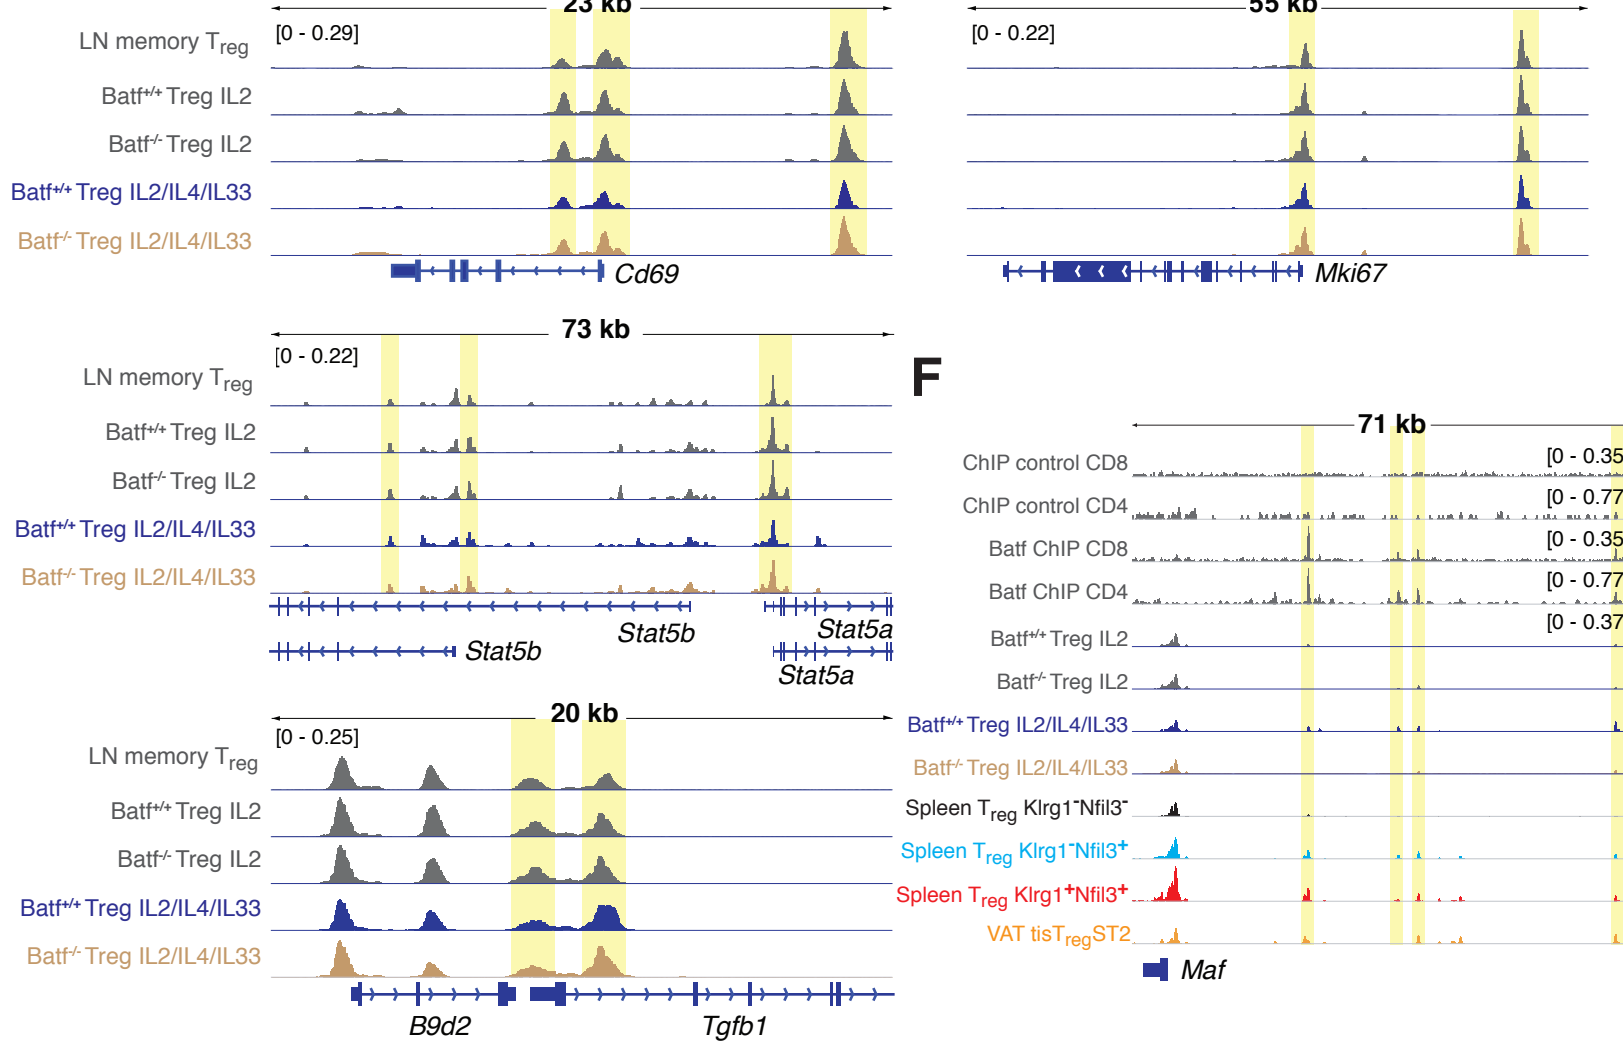

## F

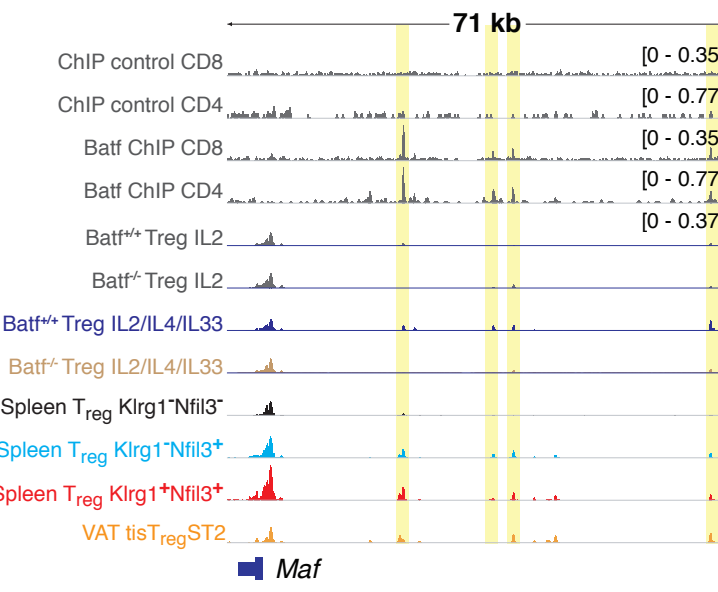

**Figure S7. Batf and tissue Treg development, related to Figure 7.** (A) Spleen Treg (CD4<sup>+</sup>CD25<sup>+</sup>*Foxp3*(GFP)<sup>+</sup>) or Tconv (CD4<sup>+</sup>CD25<sup>+</sup>*Foxp3*(GFP)<sup>+</sup>) cells were expanded with anti-CD3/28 microbeads and cytokines *in-vitro* for six days, followed by RNA isolation and cDNA synthesis. *Nfil3* gene expression was measured by RT-PCR and normalized to a house keeping gene (*Hprt*). Induction was calculated based on baseline *Nfil3* gene expression in untreated expanded Treg or Tconv cells and used to generate heatmap (colour code normalized to Treg and Tconv values) (n=1). (B) Cytokine titration of expanded Treg and Tconv as in (A), followed by measurement of *Areg* and *Il10* RNA and protein (n=1). (C) Time course experiment with expanded Treg cells and a fixed dose of 100 ng/mL IL-4 and 100 ng/mL IL-33 and four replicates (n=4). Cytokines and media were exchanged on day 7. On day 1, 3, 5, 7, 9, and 11, RNA was extracted and gene expression of *Il1lr1*, *Klrg1*, *Areg* and *IL10* was measured by RT-PCR. Expression was normalized to control wells treated with IL-2 only (n=4). (D) Cytokine titration of expanded Treg cells as in (A-B), this time with IL-4 vs IFN- $\gamma$ , IL-4 vs IL5, IL-4 vs IL-9, and IL-4 vs IL-13. Gene expression of *Nfil3* is shown (n=1). (E) ATAC-seq data for the *Cd69*, *Mki67*, *Stat5a*, *Stat5b*, and *Tgfb1* gene and associated promoter region with LN-derived CD25<sup>+</sup>*Foxp3*(GFP)<sup>+</sup>CD44<sup>+</sup> memory Treg (grey) as well as *Batf*<sup>-/-</sup> or control Treg cells treated with either IL-2 or IL-2/IL-4/IL-33 for six days *in-vitro* (grey, blue, light brown). Y-axis ATAC signal intensity, x-axis gene structure, with exons indicated as heightened bars and introns as line, arrows indicate gene direction. All datasets group-normalized to maximum peak height indicated in brackets. Overall display length indicated on top in kilobases (kb). Yellow box indicates area of interest (n=4). (F) ATAC-seq data for the *Maf* gene and associated promoter region as in (E), with top 4 lanes public dataset-derived *Batf* CHIP-seq data for CD4 or CD8 T cells including antibody control data (dark grey). Below, *Batf*<sup>-/-</sup> or control Treg cells treated with either IL-2 or IL-2/IL-4/IL-33 for six days *in-vitro* (grey, blue, light brown), spleen-derived *Klrg1*<sup>-</sup>*Nfil3*(GFP)<sup>-</sup> Treg cells (black), spleen *Klrg1*<sup>-</sup>*Nfil3*(GFP)<sup>+</sup> Treg cells (light blue), spleen *Klrg1*<sup>+</sup>*Nfil3*(GFP)<sup>+</sup> Treg cells (red) and VAT-derived tisTregST2 (orange) (n=4). Data representative of independent experiments or cell sorts.
